# Supplementary material for: Membrane-Permeable Calpain Inhibitors Promote Rat Oral Mucosal Epithelial Cell Proliferation by Inhibiting IL-1α Signaling
Source: PubMed Central journal article supplement (PMC4521813; doi:10.1371/journal.pone.0134240), 2015-07-31

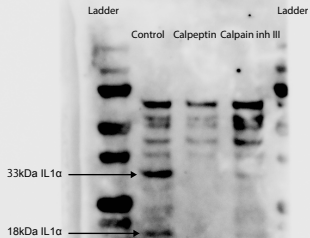

Supplement: pone.0134240.s002.pdf [file pone.0134240.s002.pdf]
